# Supplementary material for: Astrocyte-derived exosomes enriched with miR-873a-5p inhibit neuroinflammation via microglia phenotype modulation after traumatic brain injury
Source: Springer Nature journal article supplement (doi:10.1186/s12974-020-01761-0), 2020-03-19

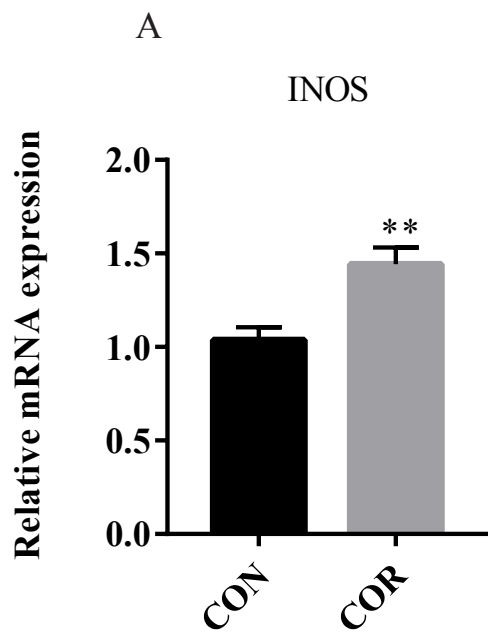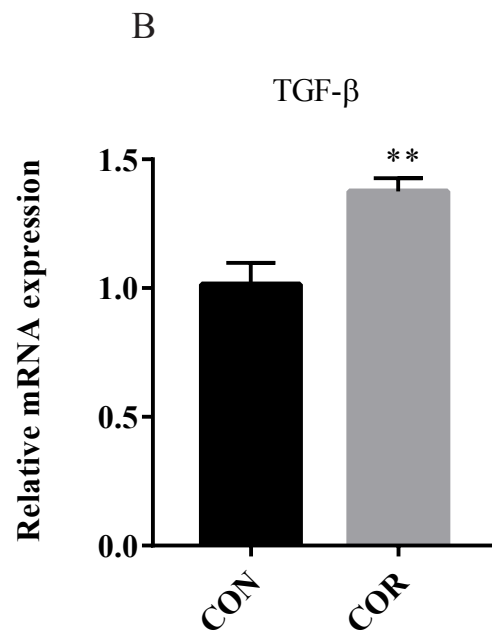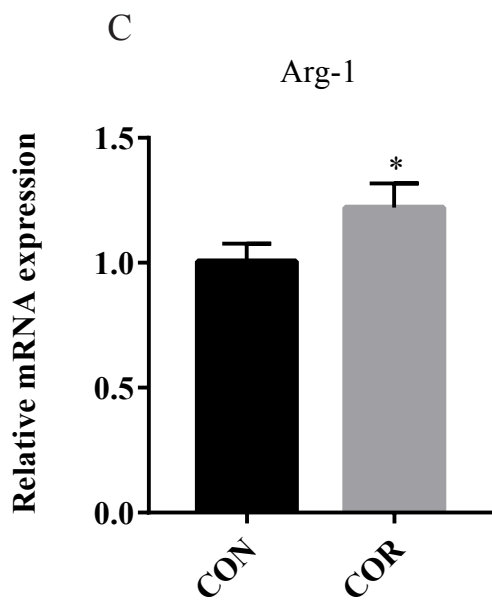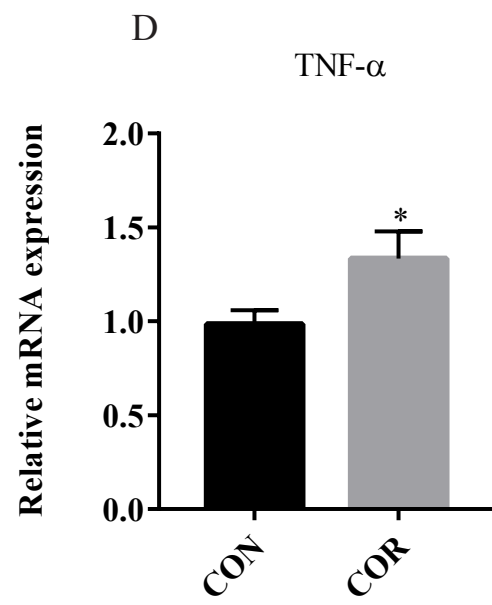

Supplement: MOESM1 [file 17815954]
