# Supplementary material for: Astrocyte-derived exosomes enriched with miR-873a-5p inhibit neuroinflammation via microglia phenotype modulation after traumatic brain injury
Source: Springer Nature journal article supplement (doi:10.1186/s12974-020-01761-0), 2020-03-19
Supplement: MOESM2 [file 17815954]

**Additional table 1.** The 15 clinical patients' information.

| Patient ID | Gender | Age | Region of the brain | Glasgow coma scale |
|------------|--------|-----|---------------------|--------------------|
| 01         | Male   | 58  | Right frontal lobe  | 6                  |
| 02         | Male   | 48  | Left frontal lobe   | 5                  |
| 03         | Male   | 38  | Left frontal lobe   | 6                  |
| 04         | Female | 49  | Left frontal lobe   | 5                  |
| 05         | Male   | 35  | Right frontal lobe  | 6                  |
| 06         | Male   | 54  | Left frontal lobe   | 5                  |
| 07         | Male   | 36  | Right frontal lobe  | 5                  |
| 08         | Female | 37  | Left frontal lobe   | 7                  |
| 09         | Male   | 42  | Right frontal lobe  | 7                  |
| 10         | Male   | 46  | Right frontal lobe  | 6                  |
| 11         | Male   | 54  | Right frontal lobe  | 7                  |
| 12         | Female | 57  | Left frontal lobe   | 6                  |
| 13         | Male   | 38  | Right frontal lobe  | 5                  |
| 14         | Male   | 41  | Right frontal lobe  | 6                  |
| 15         | Male   | 39  | Left frontal lobe   | 7                  |
